# Supplementary figures and images for: Cortical spheroids display oscillatory network dynamics
Source: Royal Society of Chemistry journal article supplement (doi:10.1039/d1lc00737h), 2021-01-01

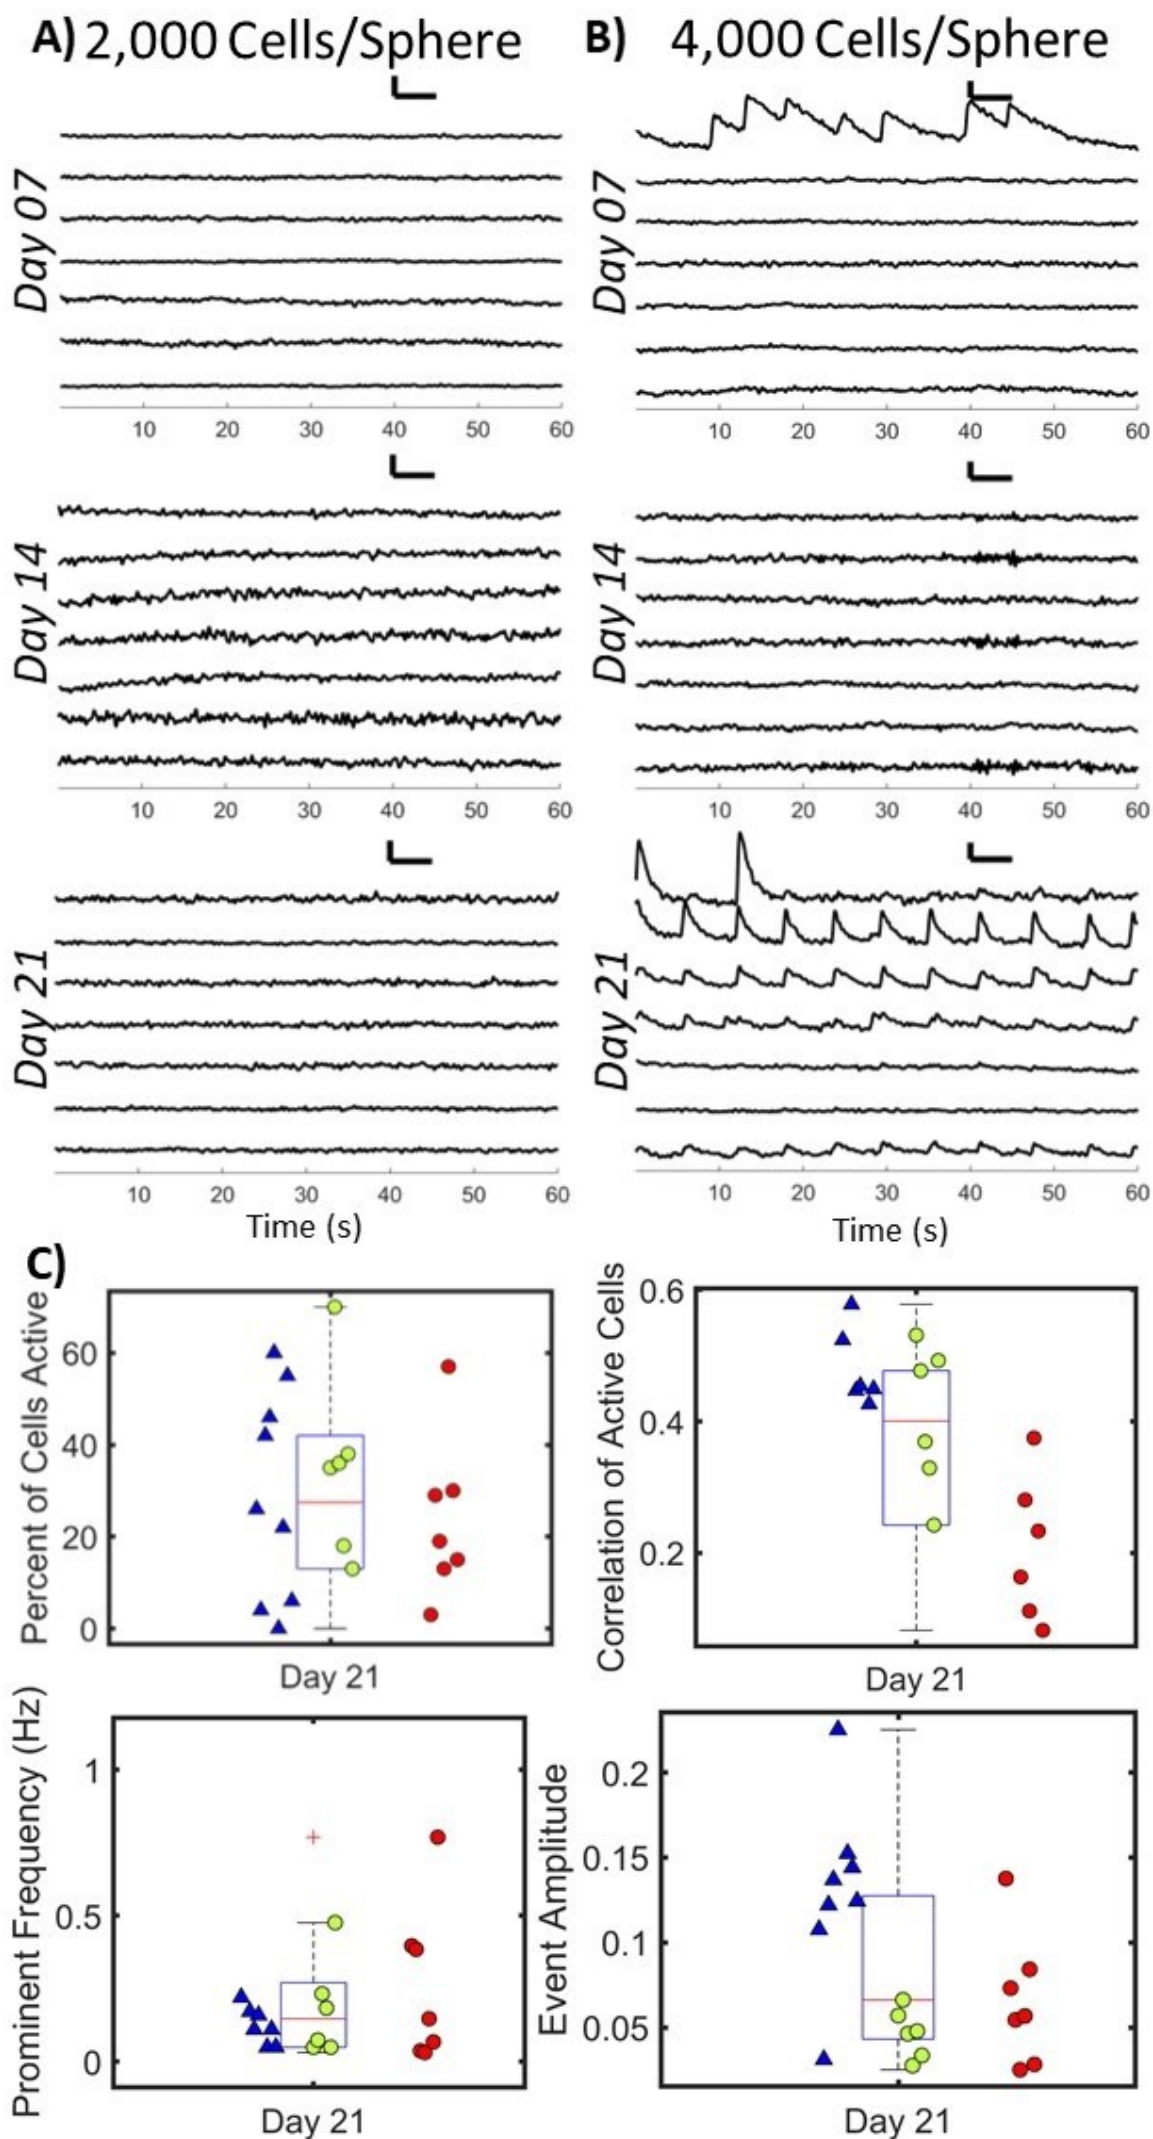

Supplement: d1lc00737h3.pdf [file d1lc00737h3.pdf]
